# Supplementary material for: Ca3Lu(AlO)3(BO3)4 : Sm3+: a novel red-emitting phosphor with high colour purity for NUV-based warm white LEDs
Source: Royal Society of Chemistry journal article supplement (doi:10.1039/c8ra08374f), 2018-01-01
Supplement: c8ra08374f1.pdf [file c8ra08374f1.pdf]

## Electronic Supporting Information

### **Ca<sub>3</sub>Lu(AlO)<sub>3</sub>(BO<sub>3</sub>)<sub>4</sub>:Sm<sup>3+</sup>: A novel red-emitting phosphor with high colour purity for NUV-based warm white LEDs**

Wasim ullah khan<sup>#a</sup>, Sunilkumar Baburao Mane<sup>#a</sup>, Salim ullah khan<sup>b</sup>, Dongdong Zhou<sup>a</sup>, Dilfaraz Khan<sup>b</sup>, Qiaoxi Yu<sup>a</sup>, Weijie zhou<sup>a</sup>, Lei Zhou<sup>\*a</sup>, Jianxin Shi<sup>a\*</sup> and Mingmei Wu<sup>a\*</sup>

*a. MOE Key Laboratory of Bioinorganic and Synthetic Chemistry, School of Chemistry, Sun Yat-Sen University, Guangzhou 510275, P. R. China.*

*b. Institute of Chemical Sciences, Gomal University, Dera Ismail Khan, KPK, Pakistan.*

*\* Corresponding authors: nx-zhoulei@foxmail.com (Lei Zhou); cessjx@mail.sysu.edu.cn (Jianxin Shi); ceswmm@mail.sysu.edu.cn (Mingmei Wu).*

## CONTENTS

1. Table. S1 Refinement crystallographic parameters for CLAB:Sm<sup>3+</sup>.
2. Table. S2 Some selected bond lengths of CLAB:Sm<sup>3+</sup> phosphor.
3. Table. S3 The quantitative EDAX analysis data of CLAB:0.05Sm<sup>3+</sup> phosphor [Calcinated at 1100 °C for 4 h].
4. Table. S4 Colour coordinates, correlated colour temperature and colour purity calculated from emission spectra under 404 nm excitation for CLAB:xSm<sup>3+</sup>.

Table. S1 Refinement crystallographic parameters for CLAB:Sm<sup>3+</sup>

| Atoms  | Site | x          | y          | z           | U <sub>iso</sub> | n               |
|--------|------|------------|------------|-------------|------------------|-----------------|
| Ca/Lu1 | 2c   | 1/3        | 2/3        | 1/4         | 0.0120(13)       | 0.201/0.797(14) |
| Ca/Lu2 | 6h   | 0.14211(5) | 0.87486(5) | 1/4         | 0.016(2)         | 0.930/0.068(5)  |
| Al     | 6g   | 0          | 1/2        | 0           | 0.0160(15)       | 1               |
| B1     | 6h   | 0.229(3)   | 0.773(3)   | 3/4         | 0.004(5)         | 1               |
| B2     | 4e   | 0          | 0          | 0.076(12)   | 0.04(2)          | 1/2             |
| O1     | 12i  | 0.0839(13) | 0.4678(12) | 1/4         | 0.016(4)         | 1               |
| O2     | 12i  | 0.3305(2)  | 0.9192(14) | 3/4         | 0.019(4)         | 1               |
| O3     | 6h   | 0.3035(9)  | 0.4717(8)  | 0.53934(12) | 0.010(2)         | 1               |
| O4     | 6h   | 0.0847(3)  | 0.9022(3)  | 0.587(3)    | 0.016(4)         | 1/2             |

Space group *P63/m*:  $a = b = 10.4014(4)$  Å,  $c = 5.7000(2)$  Å,  $V = 534.06(3)$  Å<sup>3</sup>,  $R_p = 5.64\%$ ,  $R_{wp} = 9.81\%$ ,  $\chi^2 = 1.314$ .

Table. S2 Some selected bond lengths of CLAB:Sm<sup>3+</sup> phosphor.

|           |                 |
|-----------|-----------------|
| Ca/Lu1–O1 | 2.301(11) Å X 3 |
| Ca/Lu1–O3 | 2.475(7) Å X 6  |
| Ca/Lu2–O1 | 2.382(11) Å X 1 |
| Ca/Lu2–O2 | 2.385(11) Å X 1 |
| Ca/Lu2–O3 | 2.325(8) Å X 2  |
| Ca/Lu2–O4 | 2.386(2) Å X 1  |
| Ca/Lu2–O4 | 2.421(3) Å X 1  |
| Ca/Lu2–O4 | 2.423(3) Å X 1  |
| Al–O1     | 1.926(7) Å X 2  |
| Al–O2     | 2.080(10) Å X 2 |
| Al–O3     | 1.810(8) Å X 2  |
| B1–O2     | 1.406(3) Å X 1  |
| B1–O3     | 1.348(2) Å X 2  |
| B2–O4     | 1.315(13) Å X 3 |

Table. S3 The quantitative EDAX analysis data of CLAB:0.05Sm<sup>3</sup> phosphor [Calcinated at 1100 °C for 4 h].

| Element | Wt%   | At%   |
|---------|-------|-------|
| Ca K    | 32.33 | 22.88 |
| Lu K    | 25.33 | 13.38 |
| Al K    | 7.03  | 7.37  |
| B K     | 30.26 | 11.56 |
| O K     | 43.62 | 57.73 |
| Sm L    | 3.16  | 0.60  |

Table. S4 Colour coordinates, correlated colour temperature and colour purity calculated from emission spectra under 404 nm excitation for CLAB: $x\text{Sm}^{3+}$ .

| Value of $x$ | Colour coordinates |       | CCT (K) | Colour purity (%) |
|--------------|--------------------|-------|---------|-------------------|
|              | $x$                | $y$   |         |                   |
| 0.01         | 0.613              | 0.382 | 3119    | 98.532            |
| 0.05         | 0.615              | 0.38  | 3279    | 98.530            |
| 0.10         | 0.613              | 0.38  | 3212    | 97.933            |
| 0.15         | 0.609              | 0.381 | 3041    | 97.035            |
| 0.20         | 0.608              | 0.379 | 3099    | 96.136            |

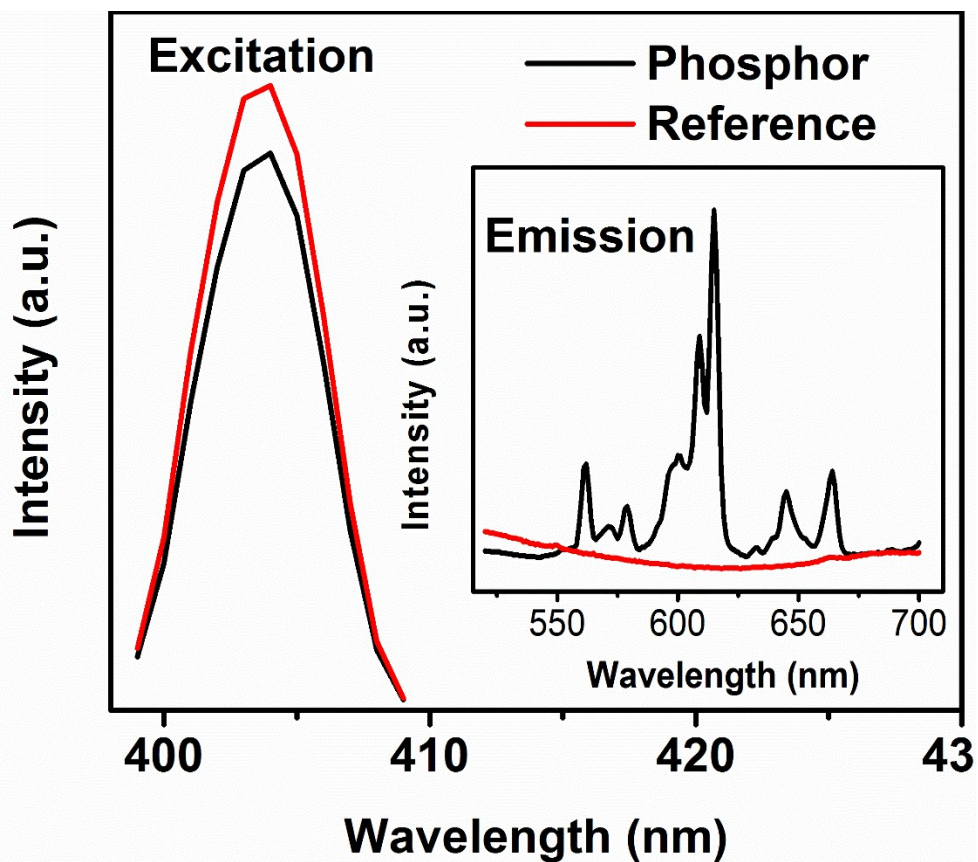

Fig. S1. PL excitation and emission spectra of the CLAB:0.05Sm<sup>3+</sup> phosphor and the reference sample, measured by using a Horiba FL3 (Japan) attached with an integrating sphere for quantum yield measurement. Inset illustrates the emission spectra in the wavelength range of 520–720 nm.

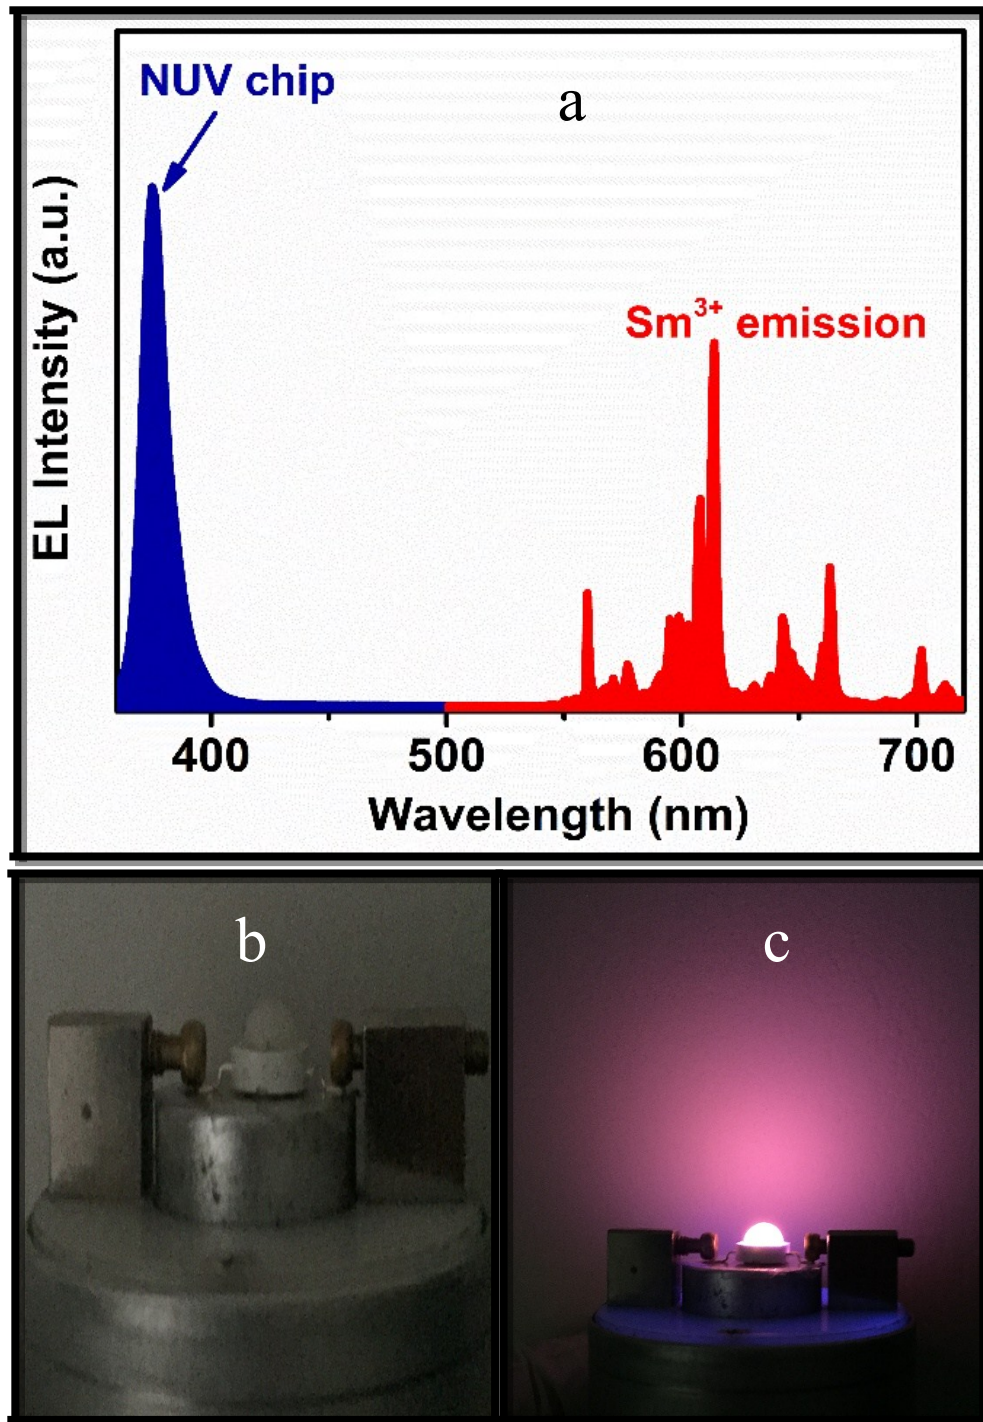

Fig. S2. EL spectrum of the fabricated red-emitting LED device under a forward bias current of 100 mA (a), fully packaged LED device (b) and image of the fabricated LED device under a bias current of 100 mA (c).
